# Supplementary material
Source: MDPI journal article supplement (https://www.mdpi.com/2073-4395/13/6/1647)
Supplement: s1 [file s1]

## Supplementary Material

**Table S1.** Nutrient Content of Manure and Straw.

| Treatment | Type        | Measurement time | Input amount (t ha <sup>-1</sup> ) | water content (%) | Carbon (%) | Nitrogen (%) | Phosphorus (%) | Potassium (%) |
|-----------|-------------|------------------|------------------------------------|-------------------|------------|--------------|----------------|---------------|
| M         | Pig manure  | 1991             | 60                                 | 70.0              | 38.6       | 2.01         | 1.29           | 1.25          |
|           |             | 2004             | 60                                 | 69.6              | 40.2       | 1.94         | 2.03           | 1.74          |
|           |             | 2008             | 60                                 | 70.2              | 31.6       | 2.56         | 1.79           | 1.30          |
|           |             | 2012             | 60                                 | 72.9              | 38.9       | 1.30         | 1.20           | 0.83          |
| MNPk      | Pig manure  | 1991             | 42                                 | 70.0              | 38.6       | 2.01         | 1.29           | 1.25          |
|           |             | 2004             | 42                                 | 69.6              | 40.2       | 1.94         | 2.03           | 1.74          |
|           |             | 2008             | 42                                 | 70.2              | 31.6       | 2.56         | 1.79           | 1.30          |
|           |             | 2012             | 42                                 | 72.9              | 38.9       | 1.30         | 1.20           | 0.83          |
| NMPS      | Wheat straw | 1991             | 1.72                               | -                 | 41.9       | 0.67         | 0.09           | 1.85          |
|           |             | 2004             | 1.30                               | -                 | 41.9       | 0.44         | 0.04           | 1.96          |
|           |             | 2007             | 0.75                               | -                 | 41.9       | 0.38         | 0.10           | 1.29          |
|           |             | 2012             | 0.60                               | -                 | 41.9       | 0.72         | 0.11           | 2.22          |
|           | Corn straw  | 1991             | 1.34                               | -                 | 42.7       | 1.04         | 0.24           | 1.98          |
|           |             | 2004             | 1.02                               | -                 | 42.7       | 0.99         | 0.28           | 1.84          |
|           |             | 2009             | 1.25                               | -                 | 42.7       | 1.43         | 0.23           | 2.25          |
|           |             | 2012             | 0.57                               | -                 | 42.7       | 0.96         | 0.33           | 1.96          |

M, manure ; MNPk, manure, nitrogen, phosphorus and potassium; NPkS, nitrogen, phosphorus, potassium, straw.

**Table S2.** Soil Olsen P profile in 2001(mg kg<sup>-1</sup>).

| Depth(cm) | Treatment |      |       |
|-----------|-----------|------|-------|
|           | CK        | M    | MNPk  |
| 0-20      | 3.56      | 83.6 | 91.05 |
| 20-40     | 2.39      | 2.6  | 59.61 |
| 40-60     | 2.44      | 1.32 | 12.3  |
| 60-80     | 1.94      | 0.83 | 13.79 |
| 80-100    | 0.28      | 0.65 | 0.97  |
| 100-120   | 0.25      | 0.63 | 0.69  |
| 120-140   | 0.64      | 0.75 | 0.81  |
| 140-160   | 0.76      | 0.48 | 0.87  |
| 160-180   | 0.31      | 3.25 | 0.81  |
| 180-200   | 0.75      | 0.44 | 2.09  |

CK, no fertilizer; M, manure ; MNPk, manure, nitrogen, phosphorus and potassium.

**Table S3.** Crop yield (kg ha<sup>-1</sup>).

| Year      | Treatment | Wheat               |                     | Corn                |                     |
|-----------|-----------|---------------------|---------------------|---------------------|---------------------|
|           |           | Average grain yield | Average straw yield | Average grain yield | Average straw yield |
| 1990-2000 | NPK       | 1704                | 4198                | 3690                | 3907                |
|           | NPKS      | 1841                | 4821                | 3980                | 4021                |
|           | M         | 1066                | 2788                | 3749                | 3696                |
|           | MNPK      | 1580                | 3821                | 4609                | 4290                |
| 2001-2010 | NPK       | 884                 | 1303                | 2928                | 2320                |
|           | NPKS      | 574                 | 1157                | 2308                | 1993                |
|           | M         | 1596                | 3050                | 4187                | 4022                |
|           | MNPK      | 1840                | 3430                | 5552                | 5135                |
| 2011-2018 | NPK       | 532                 | 1425                | 1464                | 1378                |
|           | NPKS      | 503                 | 1463                | 1143                | 1523                |
|           | M         | 1158                | 3291                | 4077                | 3496                |
|           | MNPK      | 1382                | 4171                | 5488                | 4892                |

**Table S4.** Physical properties and chemical properties (2018) in red soil.

| Treatment | TP (g kg <sup>-1</sup> ) | Olsen P(mg kg <sup>-1</sup> ) | SOC(g kg <sup>-1</sup> ) | TN (g kg <sup>-1</sup> ) | AN (mg kg <sup>-1</sup> ) |
|-----------|--------------------------|-------------------------------|--------------------------|--------------------------|---------------------------|
| NPK       | 1.14                     | 74                            | 11.3                     | 1.18                     | 93.4                      |
| NPKS      | 1.13                     | 82.9                          | 10.4                     | 1.13                     | 85.2                      |
| M         | 1.65                     | 183.7                         | 13.9                     | 1.59                     | 108.4                     |
| MNPK      | 2.07                     | 198.1                         | 13.6                     | 1.46                     | 108.5                     |
| Treatment | TK (g kg <sup>-1</sup> ) | AK (mg kg <sup>-1</sup> )     | pH                       | BD (g cm <sup>-3</sup> ) |                           |
| NPK       | 14.4                     | 212.2                         | 4.23                     | 1.13                     |                           |
| NPKS      | 13.8                     | 268.7                         | 4.28                     | 1.19                     |                           |
| M         | 14.5                     | 205.5                         | 6.73                     | 1.43                     |                           |
| MNPK      | 13.9                     | 338.5                         | 5.91                     | 1.38                     |                           |

TP is total phosphorus, Olsen P is available P by Olsen method, SOC is soil organic carbon, TN is total nitrogen, AN is available nitrogen, TK is total potassium, AK is available potassium, BD is bulk density.
